# Supplementary material
Source: PubMed Central journal article supplement (PMC4246300)
Supplement: pnas.201414826SI.pdf [file pnas.201414826SI.pdf]

# Supporting Information

Kim et al. 10.1073/pnas.1414826111

## Measurement of Psychological Factors

Psychological factors included depression, anxiety, negative affect, positive affect, religiosity, personal growth, and self-acceptance. These factors were assessed using measures that have been rigorously evaluated and shown good reliability and validity in previous studies. Depression was measured using the Center for Epidemiological Studies Depression Scale (CES-D) (in the Health and Retirement Study, HRS, mean = 1.43, SD = 1.94, Cronbach  $\alpha$  = 0.88), anxiety was measured using the Beck Anxiety Inventory (in HRS, mean = 1.57, SD = 0.58, Cronbach  $\alpha$  = 0.81), negative affect and positive affect were measured using a 12-item scale that was developed for use in nationally representative datasets (negative affect in HRS, mean = 1.64, SD = 0.66, Cronbach  $\alpha$  = 0.90; positive affect in HRS, mean = 3.58, SD = 0.69, Cronbach  $\alpha$  = 0.91), religiosity was measured using the Brief Multidimensional Measure of Religiousness/Spirituality (in HRS, mean = 5.13, SD = 1.38, Cronbach  $\alpha$  = 0.91),

and finally personal growth (in HRS, mean = 5.52, SD = 0.92, Cronbach  $\alpha$  = 0.76) and self-acceptance (in HRS, mean = 4.63, SD = 0.94, Cronbach  $\alpha$  = 0.82) were measured using the Psychological Well-Being Scales.

## Personal Growth and Self-Acceptance

HRS already collects information about personal growth and self-acceptance, two other dimensions of psychological well-being. Therefore, in an exploratory manner, we examined the association between personal growth and self-acceptance with preventive health care use and overnight hospitalizations. We found that both personal growth and self-acceptance were associated with more preventive health care use and fewer overnight hospitalizations. The pattern of results and the size of the associations were similar compared with purpose in life. Although these factors have received notably less research in the context of health, these important factors should be more fully explored in future research.

**Table S1. ORs for the association between purpose and preventive health care services (basic model)**

| Health service measure            | Adjusted OR (95% CI) | P value | Prevalence (%) |
|-----------------------------------|----------------------|---------|----------------|
| Preventive flu shot*              | 1.05 (0.99–1.12)     | 0.090   | 64.03          |
| Cholesterol test <sup>†</sup>     | 1.21 (1.12–1.31)     | <0.001  | 76.52          |
| Colonoscopy <sup>‡</sup>          | 1.11 (1.04–1.19)     | 0.001   | 27.24          |
| Mammogram/X-ray <sup>§</sup>      | 1.36 (1.25–1.48)     | <0.001  | 59.59          |
| Pap smear <sup>§</sup>            | 1.25 (1.15–1.37)     | <0.001  | 33.44          |
| Prostate examination <sup>¶</sup> | 1.41 (1.28–1.56)     | <0.001  | 57.61          |

All models were age-adjusted.

\* $n = 7,168$ .

<sup>†</sup>Only people with no history of heart disease or stroke ( $n = 5,160$ ).

<sup>‡</sup>Only people with no history of cancer ( $n = 6,070$ ).

<sup>§</sup>Only women with no history of cancer ( $n = 3,535$ ).

<sup>¶</sup>Only men with no history of cancer ( $n = 2,534$ ).

**Table S2. ORs for the association between purpose and preventive health care services (by tertile)**

| Model                             | Tertile group         | Adjusted RRs (95% CI) | P value |
|-----------------------------------|-----------------------|-----------------------|---------|
| Preventive flu shot*              | Low (reference group) | 1.00                  |         |
|                                   | Moderate              | 1.09 (0.95–1.25)      | 0.204   |
|                                   | High                  | 1.01 (0.88–1.16)      | 0.878   |
| Cholesterol test <sup>†</sup>     | Low (reference group) | 1.00                  |         |
|                                   | Moderate              | 1.28 (1.06–1.55)      | 0.009   |
|                                   | High                  | 1.40 (1.15–1.70)      | 0.001   |
| Colonoscopy <sup>‡</sup>          | Low (reference group) | 1.00                  |         |
|                                   | Moderate              | 1.08 (0.93–1.26)      | 0.308   |
|                                   | High                  | 1.19 (1.02–1.38)      | 0.025   |
| Mammogram/X-ray <sup>§</sup>      | Low (reference group) | 1.00                  |         |
|                                   | Moderate              | 1.32 (1.09–1.60)      | 0.005   |
|                                   | High                  | 1.57 (1.29–1.92)      | <0.001  |
| Pap smear <sup>§</sup>            | Low (reference group) | 1.00                  |         |
|                                   | Moderate              | 1.13 (0.93–1.38)      | 0.228   |
|                                   | High                  | 1.37 (1.12–1.67)      | 0.002   |
| Prostate examination <sup>¶</sup> | Low (reference group) | 1.00                  |         |
|                                   | Moderate              | 1.38 (1.10–1.72)      | 0.005   |
|                                   | High                  | 1.55 (1.23–1.95)      | <0.001  |

All models were adjusted for age, sex, race/ethnicity, marital status, education level, total wealth, insurance status, an index of major chronic illnesses.

\* $n = 7,168$ .

<sup>†</sup>Only people with no history of heart disease or stroke ( $n = 5,160$ ).

<sup>‡</sup>Only people with no history of cancer ( $n = 6,070$ ).

<sup>§</sup>Only women with no history of cancer ( $n = 3,535$ ).

<sup>¶</sup>Only men with no history of cancer ( $n = 2,534$ ).

**Table S3. RRs for the association between purpose and number of nights spent in the hospital (by tertile)**

| Model           | Tertile group         | Adjusted RRs (95% CI) | P value |
|-----------------|-----------------------|-----------------------|---------|
| 1*              | Low (reference group) | 1.00                  |         |
|                 | Moderate              | 0.77 (0.66–0.89)      | 0.001   |
|                 | High                  | 0.67 (0.56–0.79)      | <0.001  |
| 2* <sup>†</sup> | Low (reference group) | 1.00                  |         |
|                 | Moderate              | 0.83 (0.72–0.95)      | 0.010   |
|                 | High                  | 0.75 (0.64–0.89)      | 0.001   |
| 3* <sup>‡</sup> | Low (reference group) | 1.00                  |         |
|                 | Moderate              | 0.81 (0.70–0.93)      | 0.003   |
|                 | High                  | 0.72 (0.62–0.85)      | <0.001  |
| 4* <sup>§</sup> | Low (reference group) | 1.00                  |         |
|                 | Moderate              | 0.77 (0.66–0.89)      | 0.001   |
|                 | High                  | 0.67 (0.57–0.79)      | <0.001  |
| 5* <sup>¶</sup> | Low (reference group) | 1.00                  |         |
|                 | Moderate              | 0.86 (0.75–0.99)      | 0.034   |
|                 | High                  | 0.80 (0.68–0.94)      | 0.008   |

\*Core sociodemographic factors: age, sex, race/ethnicity, marital status, education level, total wealth, insurance status.

<sup>†</sup>Baseline health: index of major chronic illnesses.

<sup>‡</sup>Health behaviors: smoking, exercise, alcohol use.

<sup>§</sup>Geographic: region, urbancity.

<sup>¶</sup>All covariates: age, sex, race/ethnicity, marital status, education level, total wealth, insurance status, index of major chronic illnesses, smoking, exercise, alcohol use, region, urbancity.
